# Supplementary material for: Impact of Lidocaine on Pain-Related Grooming in Cuttlefish
Source: MDPI journal article supplement (doi:10.3390/biology11111560), 2022-10-24
Supplement: s1 [file s1]

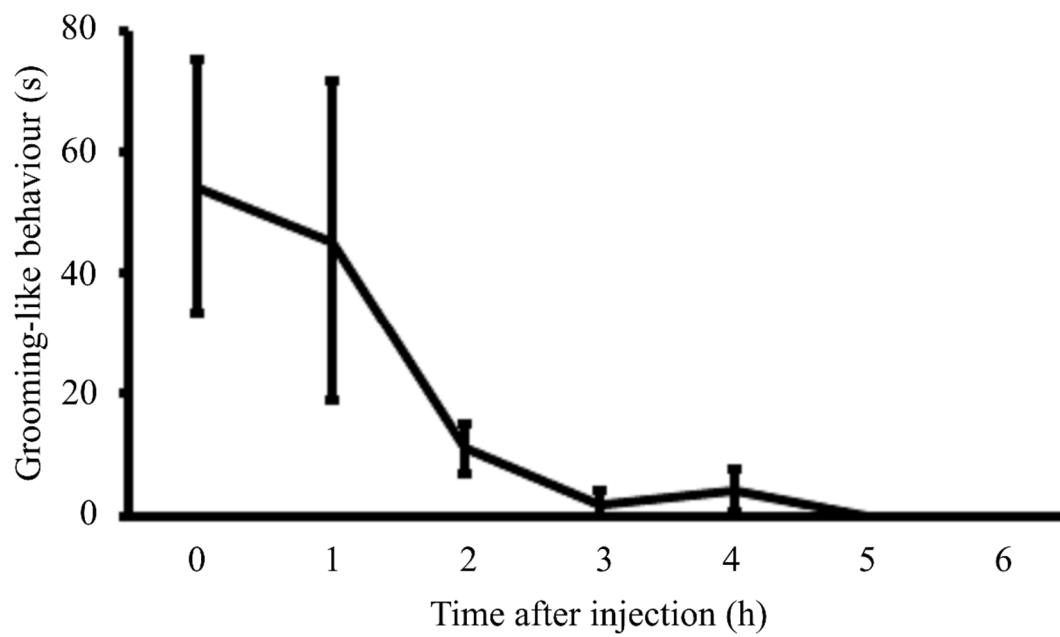

**Figure S1.** The grooming behaviour in cuttlefish was only observed in the 3 hours after 2% acetic acid injection. (n=4).

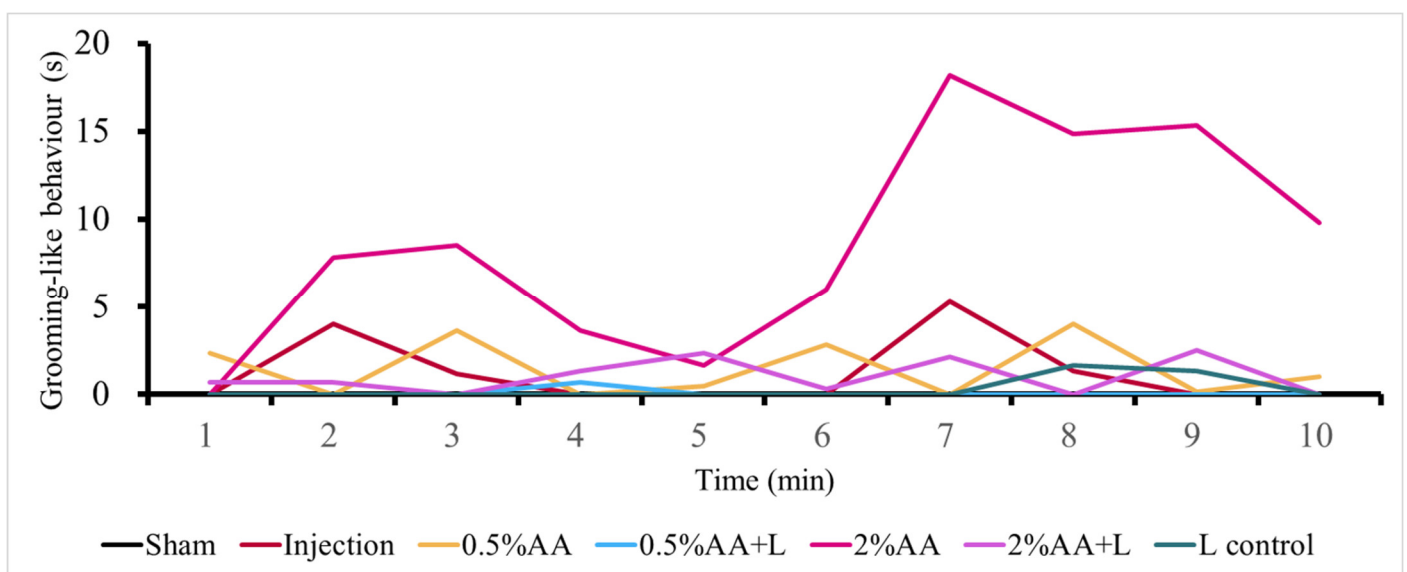

**Figure S2.** The grooming behaviour in cuttlefish was equally distributed during the 10-minute observation period.
