# Supplementary material for: Impact of Lidocaine on Pain-Related Grooming in Cuttlefish
Source: Biology (Basel). 2022 Oct 24;11(11):1560. doi: 10.3390/biology11111560 (PMC9687578; doi:10.3390/biology11111560)
Supplement: Supplementary file 1 [file biology-11-01560-s001.zip › Data-R1.xlsx]

## Sheet: Sheet1
	Sham control	Injection control	0.5% Acetic acid	0.5% Acetic acid & 2% Lidocaine	2% Acetic acid	2% Acetic acid & 3% Lidocaine	Lidocaine control
	0	0	11	0	75	0	0
	0	7	11	0	80	4	0
	0	20	14	0	81	5	18
	0	20	15	0	89	12	0
	0	10	17	0	93	15	0
		14	19	4	97	24	0
Average grooming-like behaviour (second)	0	11.8333	14.5	0.666667	85.8333	10	10
S.E.M.	0	3.18765	1.31022	0.666667	3.46811	3.58701	3
